# Supplementary material for: Tobacco smoke carcinogens exacerbate APOBEC mutagenesis and carcinogenesis
Source: bioRxiv preprint, doi:10.1101/2025.01.18.633716, version 1 (2025-01-22)
Supplement: Supplementary Table 1 [file 633716_file02.xlsx]

## Sheet: Sheet1
Supplementary Table 1	Mutational profiles of murine tumors
Cohort	Source	Tumor ID	SBS2 mutations	SBS2 percent	SBS4 mutations	SBS4 percent	SBS29 mutations	SBS29 percent	Total SBS mutations	Total indels
WT HCC	PMID: 37797615	827_liver_tumor	0	0	0	0	0	0	1357	166
WT HCC	PMID: 37797615	606_liver_tumor	0	0	0	0	0	0	1855	366
WT HCC	PMID: 37797615	412_liver_tumor	0	0	0	0	0	0	2578	1198
WT HCC	PMID: 37797615	560_liver_tumor	0	0	0	0	0	0	3619	392
WT lymphoma	PMID: 37797615	412_spleen	0	0	0	0	0	0	1372	139
WT lymphoma	PMID: 37797615	560_lymphoma	0	0	0	0	0	0	1373	202
WT lymphoma	PMID: 37797615	615_lymphoma_2	0	0	0	0	0	0	1989	2675
WT lymphoma	PMID: 37797615	615_lymphoma_1	0	0	0	0	0	0	2244	2541
WT lymphoma	PMID: 37797615	615_spleen	0	0	0	0	0	0	2297	565
A3B HCC	PMID: 37797615	78_liver_tumor	0	0	0	0	0	0	884	187
A3B HCC	PMID: 37797615	520_liver_tumor_1	0	0	0	0	0	0	1285	375
A3B HCC	PMID: 37797615	43_Liver_tumor_1	45	3.24441	0	0	0	0	1387	91
A3B HCC	PMID: 37797615	132_liver_tumor	0	0	0	0	0	0	1444	246
A3B HCC	PMID: 37797615	80_liver_2	0	0	0	0	0	0	1549	396
A3B HCC	PMID: 37797615	43_Lung_tumor_2	124	6.57128	0	0	0	0	1887	162
A3B HCC	PMID: 37797615	43_Liver_tumor_2	79	3.81827	0	0	0	0	2069	120
A3B HCC	PMID: 37797615	43_Lung_tumor_1	120	5.51978	0	0	0	0	2174	115
A3B lymphoma	PMID: 37797615	80_lymphoma	0	0	0	0	0	0	648	36
A3B lymphoma	PMID: 37797615	98_spleen	0	0	0	0	0	0	1099	182
A3B lymphoma	PMID: 37797615	129_spleen	0	0	0	0	0	0	1123	177
A3B lymphoma	PMID: 37797615	98_cervical_lymph	0	0	0	0	0	0	1200	156
A3B lymphoma	PMID: 37797615	129_ovarian_tumor	0	0	0	0	0	0	1236	176
A3B lymphoma	PMID: 37797615	131_liver_tumor_3	0	0	0	0	0	0	1965	488
A3B lymphoma	PMID: 37797615	97_spleen	0	0	0	0	0	0	2275	372
A3B lymphoma	PMID: 37797615	83_lymphoma	0	0	0	0	0	0	2292	332
A3B lymphoma	PMID: 37797615	131_splenomegaly	84	2.94944	0	0	0	0	2848	101
A3B lymphoma	PMID: 37797615	99_duodenum_tumor_2	108	2.8147	0	0	0	0	3837	918
A3B lymphoma	PMID: 37797615	99_spleen	190	4.079	0	0	0	0	4658	566
A3B lymphoma	PMID: 37797615	136_lymphoma	162	2.51397	0	0	0	0	6444	601
A3B lymphoma	PMID: 37797615	99_duodenum_tumor_1	185	2.85054	0	0	0	0	6490	1482
A3B lymphoma	PMID: 37797615	131_renal_node_2	0	0	0	0	0	0	8506	5879
A3B lymphoma	PMID: 37797615	131_soft_tissue_sarcoma	0	0	0	0	0	0	9432	7960
A3B lymphoma	PMID: 37797615	131_liver_tumor_2	0	0	0	0	0	0	9810	4121
A3B lymphoma	PMID: 37797615	134_intestinal_lymphoma	203	2.05279	0	0	0	0	9889	3383
A3B lymphoma	PMID: 37797615	131_lymphoma	0	0	0	0	0	0	11227	671
A3B lymphoma	PMID: 37797615	131_liver_tumor_1	0	0	0	0	0	0	12186	1333
A3B lymphoma	PMID: 37797615	131_renal_node_1	0	0	0	0	0	0	12400	1035
A3B lymphoma	PMID: 37797615	36_peyers_patch	1303	5.70615	0	0	0	0	22835	6729
A3B lymphoma	PMID: 37797615	36_mesenteric_lymph	1303	5.09901	0	0	0	0	25554	12083
NQO WT	This study	CD_4NQO_333_tumor	0	0	52862	20.9457	62196	24.6442	252376	3542
NQO WT	This study	E4_NQO_450_tumor	0	0	79779	19.9274	93930	23.4621	400348	5439
NQO WT	This study	CD_4NQO_271_tumor	0	0	85814	20.9948	102651	25.114	408740	1434
NQO WT	This study	CD_4NQO_463_tumor	0	0	94116	21.4926	92582	21.1423	437900	3889
NQO WT	This study	CD_4NQO_347_tumor	0	0	141795	23.1282	135927	22.171	613084	3518
NQO A3B	This study	CD_4NQO_468_mouth_tumor	4750	4.19993	28361	25.0767	16652	14.7236	113097	3637
NQO A3B	This study	CD_4NQO_339_tumor	20303	7.52833	57732	21.407	48730	18.069	269688	2486
NQO A3B	This study	CD_4NQO_456_tumor	8336	2.80922	63667	21.4557	67567	22.77	296737	1918
NQO A3B	This study	CD_4NQO_178_tumor	78597	21.8197	65520	18.1893	41382	11.4883	360211	3026
NQO A3B	This study	E4_NQO_453_tumor	0	0	69834	18.1019	89060	23.0856	385782	2966
NQO A3B	This study	CD_4NQO_476_tumor	6959	1.72464	104524	25.904	87261	21.6258	403505	1447
NQO A3B	This study	CD_4NQO_457_tumor	38453	8.87163	81365	18.772	81289	18.7545	433438	1926
NQO A3B	This study	CD_4NQO_401_tumor	0	0	96807	21.673	96342	21.5688	446672	3273
NQO A3B	This study	CD_4NQO_175_tumor	17424	3.44024	95223	18.8011	110594	21.8359	506477	3981
NQO A3B	This study	CD_4NQO_468_tongue_tumor	130529	23.6167	66793	12.0849	89592	16.2099	552699	3788
NQO A3B	This study	E4_NQO_459_tumor	0	0	104866	18.691	144641	25.7803	561052	4117
NQO A3B	This study	E4_NQO_469_tumor	0	0	133180	18.2938	173908	23.8883	728005	6179
NQO E255A	This study	CD_4NQO_276_tumor	0	0	44206	22.1776	39371	19.752	199327	6410
NQO E255A	This study	CD_4NQO_286_tumor	0	0	81632	17.6763	98843	21.4032	461815	1668
NQO E255A	This study	CD_4NQO_247_tumor	0	0	141611	20.4887	163745	23.6911	691167	4048
